# Supplementary material
Source: publisher figshare collection journal article supplement (https://frontiersin.figshare.com/ndownloader/files/25861563)
Supplement: Supplementary file 1 [file 25861563]

## *Supplementary Material*

### **1 Supplement to Materials and Methods**

The KCl used for all soil extractions was EMPROVE® ESSENTIAL pH Eur,BP,E 508 (Merck KGaA, Darmstadt, Germany). The paper filters used to filter the soil extracts were Whatman #1, 150 mm diameter, lot# 16907599 (GE Healthcare UK Limited, Buckinghamshire, UK).

Filtered soil extracts were stored in 100 mL plastic (HDPE) bottles (Oy Plastex Ab, Lohja, Finland) and frozen at -20°C to await analysis. For the analyses the sample extracts were thawed, then pipetted to 96-well microplates with one standard curve at the beginning along with external quality control solutions (VKI Reference Materials RW 1 and RW 2, Eurofins Environment, Galten, DK). The plates were analyzed colorimetrically on a Victor microplate reader (PerkinElmer, Mustionkatu 6 PL 10, 20101 Turku, Finland).

For the stable isotope analysis, soil samples were dried overnight in a Heto LyoLab 3000 freeze-dryer, then sealed in 6x4mm tin cups (Elemental Microanalysis, Okehampton, UK, catalogue number D1016, batch #258746) for analysis. The isotopic composition of nitrogen was quantified on a NC2500 elemental analyzer coupled to a Thermo Scientific Delta V Plus isotope ratio mass spectrometer.

## 2 Supplementary Figures and Tables

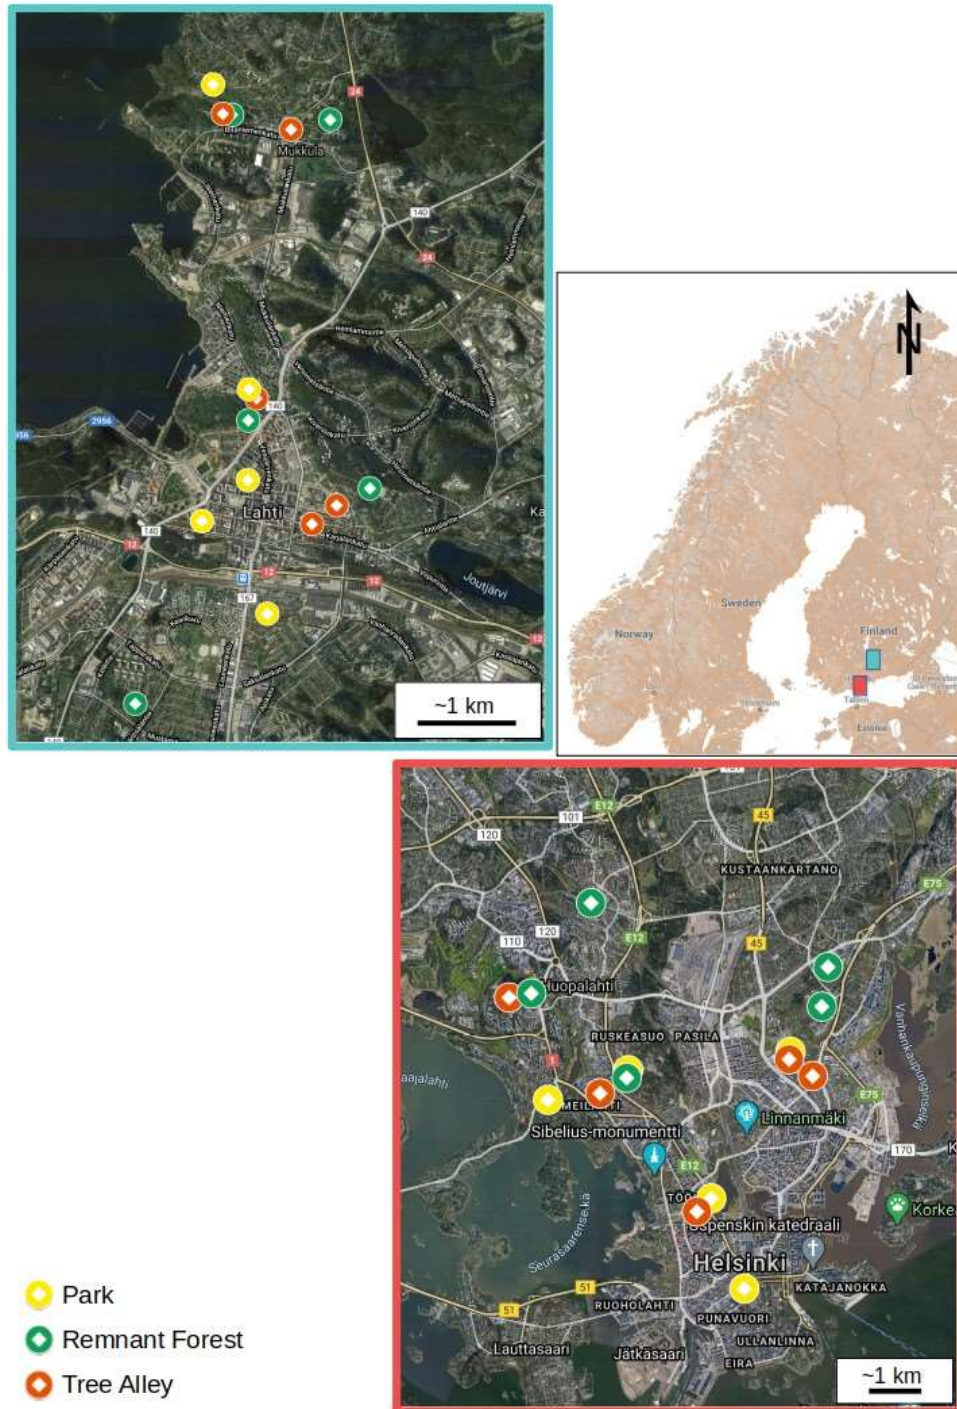

**Figure S1.** Field sites in Lahti and Helsinki, Finland. An interactive version of the site map is available at <https://bit.ly/3lQcrNq>.

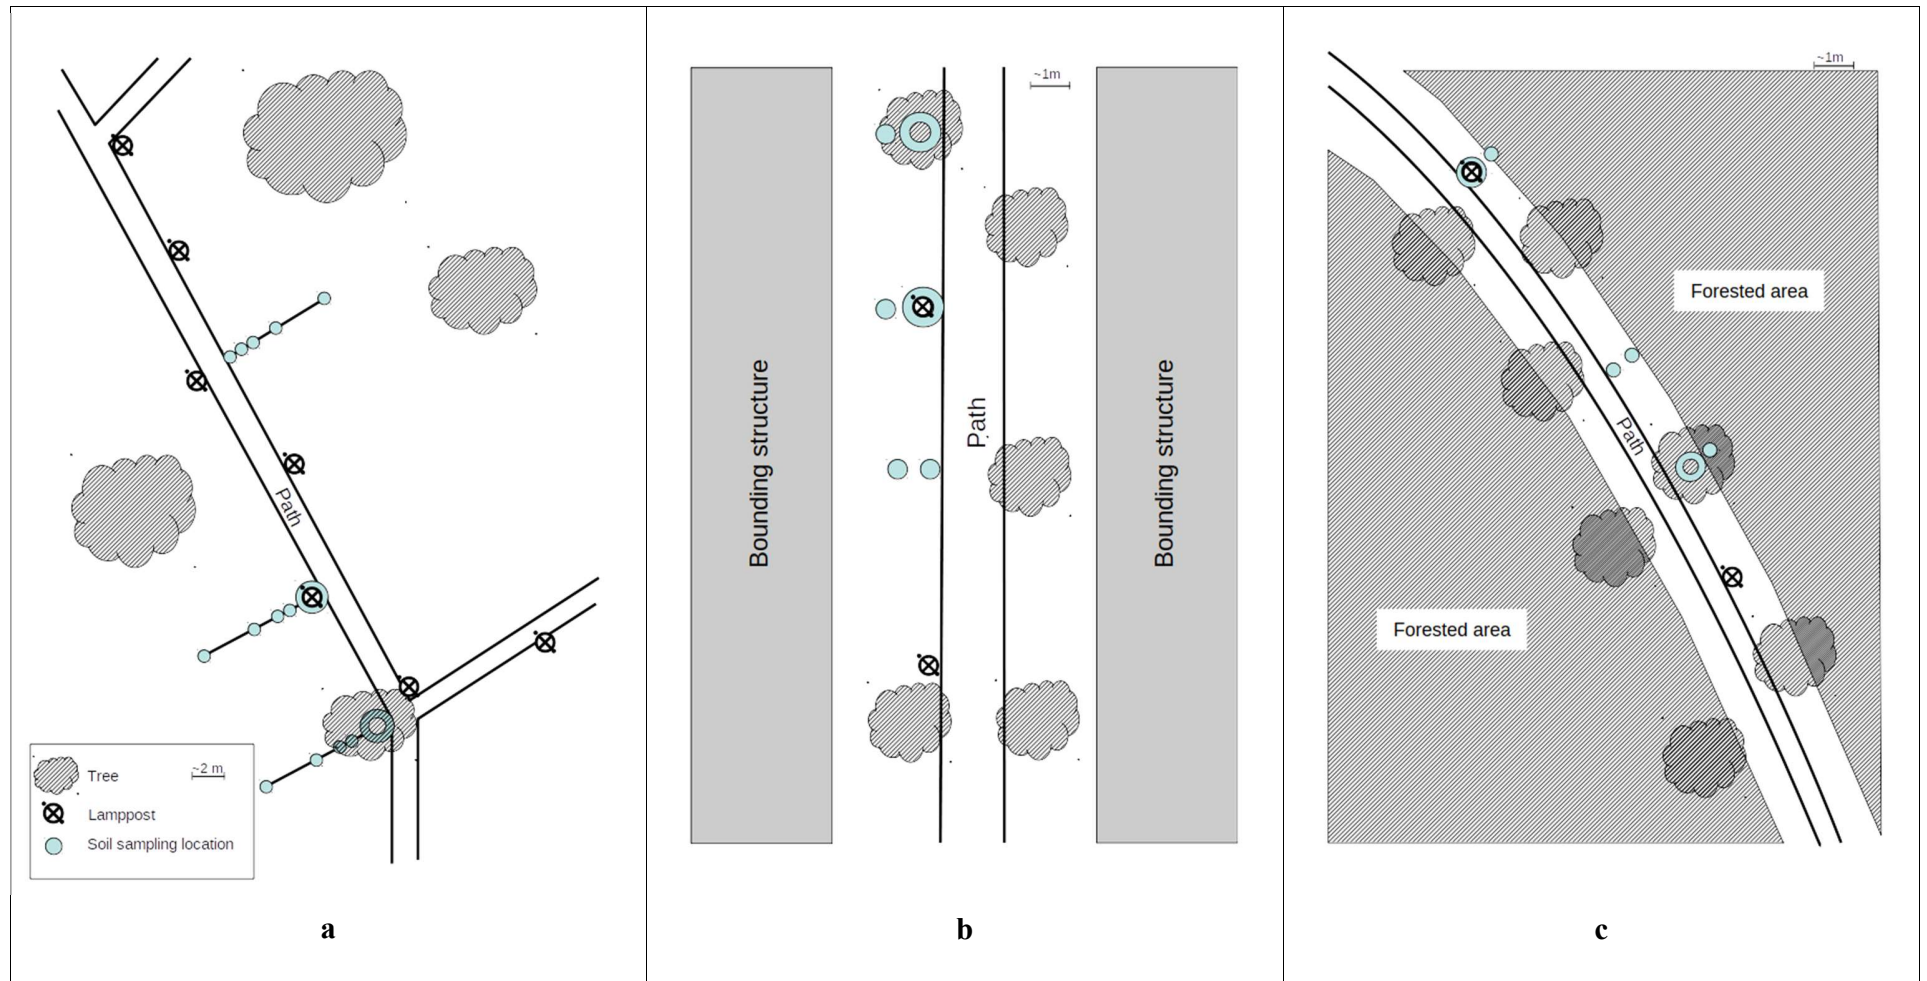

**Figure S2.** Typical layouts for the (a) Park, (b) Tree Alley and (c) Remnant Forest typologies

## Supplementary Material

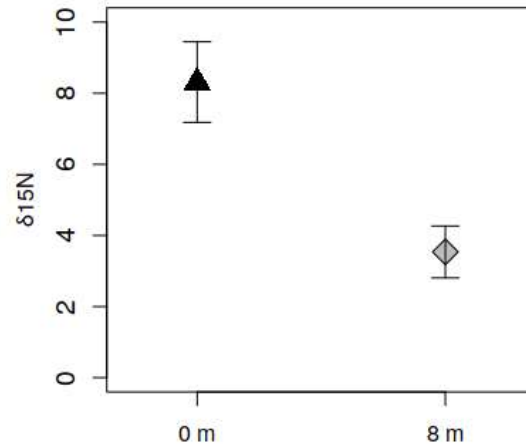

**Figure S3.**  $\delta^{15}\text{N}$  values for samples from path-side trees and poles (0 m) and from lawn areas (8 m) with standard error bars.

**Table S1.**  $\delta^{15}\text{N}$  values for soil samples from path-side trees and poles (##P0 and ##T0 designations) and from lawn areas 8 m away from pathways (##T8 and ##P8 designations).

| Sample ID | $\delta^{15}\text{N}$ (AIR) | SD of replicates | N%  | n replicates | Replicate sample $\delta^{15}\text{N}$ values |
|-----------|-----------------------------|------------------|-----|--------------|-----------------------------------------------|
| 18T0      | 6,6                         | 0,03             | 0,3 | 2            | 6.5, 6.6                                      |
| 24T0      | 10,0                        | 0,32             | 0,8 | 2            | 10.3, 9.7                                     |
| 12P8      | 2,0                         | 0,06             | 0,2 | 2            | 2.0, 2.1                                      |
| 12T20     | 11,4                        | 0,66             | 0,4 | 2            | 12.1, 10.8                                    |
| 18T8      | 3,7                         | 0,05             | 0,2 | 2            | 3.7, 3.8                                      |
| 54P8      | 5,5                         |                  | 0,4 |              |                                               |
| 63T0      | 3,7                         |                  | 0,4 |              |                                               |
| 60P0      | 9,2                         |                  | 0,5 |              |                                               |
| 25P0      | 9,0                         |                  | 0,3 |              |                                               |
| 24T8      | 2,9                         |                  | 0,4 |              |                                               |
